# Supplementary material for: Punicalagin ameliorates wear-particle-induced inflammatory bone destruction by bi-directional regulation of osteoblastic formation and osteoclastic resorption
Source: Royal Society of Chemistry journal article supplement (doi:10.1039/d0bm00718h), 2020-01-01
Supplement: d0bm00718h1.pdf [file d0bm00718h1.pdf]

## **Supplementary Materials**

### **Punicalagin ameliorates wear-particle-induced inflammatory bone destruction by bi-directional regulation of osteoblastic formation and osteoclastic resorption**

#### **The name(s) of the author(s)**

Qing Wang, MS<sup>a, 1</sup>; Gaoran Ge, MS<sup>a, 1</sup>; Xiaolong Liang, BS<sup>a, 1</sup>; Jiaxiang Bai, MS<sup>a</sup>; Wei Wang, MS<sup>a</sup>; Wenhao Zhang, MS<sup>a</sup>; Kai Zheng, MS<sup>a</sup>; Sen Yang, MS<sup>a</sup>; Minggang Wei, PhD<sup>b</sup>; Huilin Yang, PhD<sup>a</sup>; Yaozeng Xu, PhD<sup>a, \*</sup>; Boling Liu, PhD<sup>c, \*</sup>; Dechun Geng, PhD<sup>a, \*</sup>

#### **Name and address of the institution**

a: Department of Orthopaedics, The First Affiliated Hospital of Soochow University, Suzhou, 215006, China.

b: Department of Integrated Traditional and Western Medicine, The First Affiliated Hospital of Soochow University, Suzhou, 215006, China.

c: Department of Orthopaedics, Fuzhou Second Hospital affiliated to Xiamen University, Fuzhou, 350007, China.

#### **<sup>1</sup> Contribute equally to this work**

#### **\* Correspondence and requests for materials should be addressed to**

szgengdc@163.com (D. Geng), Tel: +86-0512-67780999, Fax: +86-0512-67780999;

357021837@qq.com (B. Liu), Tel: +852-34427724, Fax: +86-852-34420538;

xuyaozeng@163.com (Y. Xu), Tel: +86-511-88783268, Fax: +86-511-88783268.

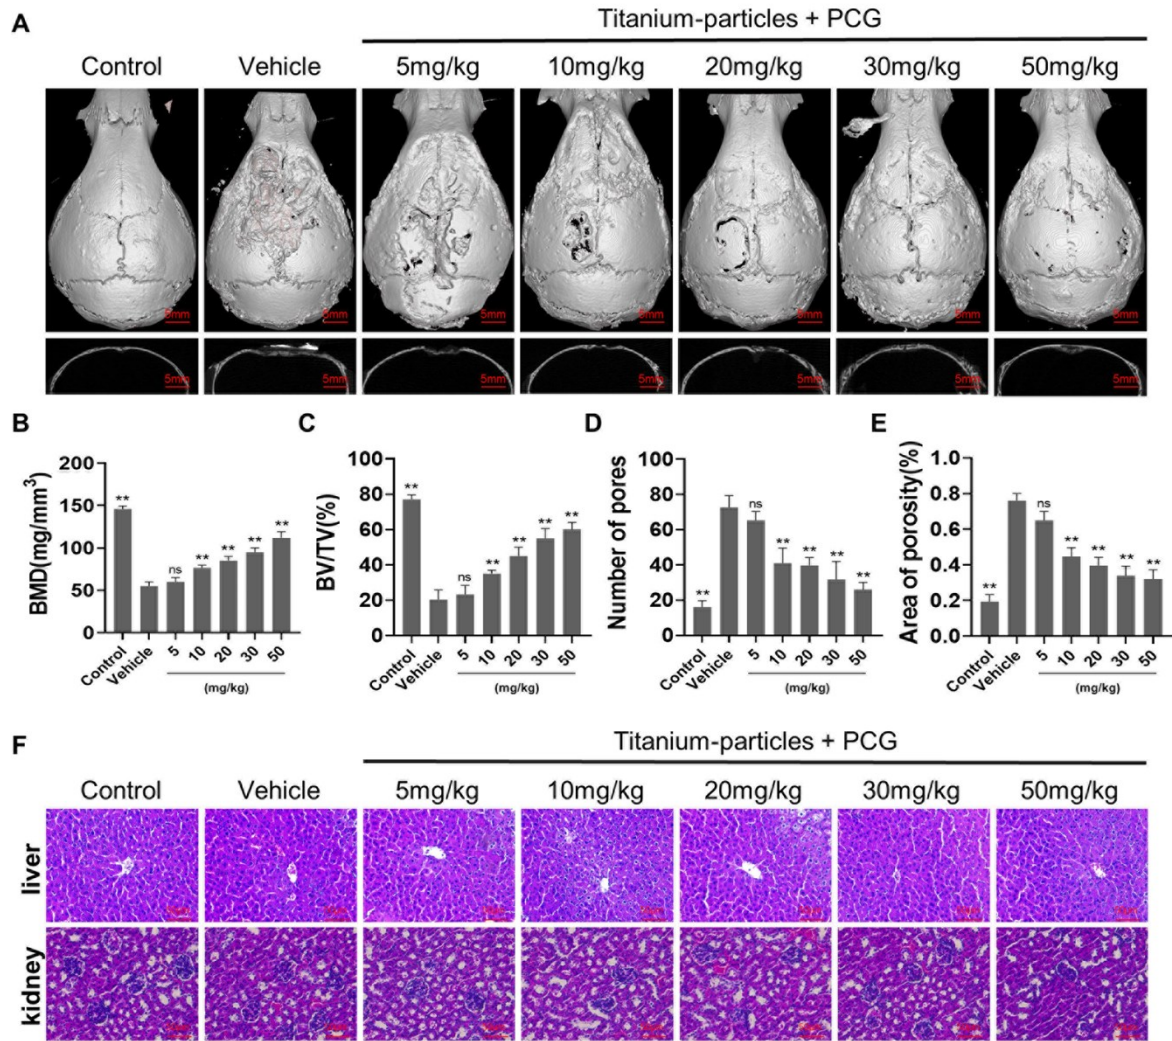

**Fig. S1.** PCG treatment attenuated Ti particle-induced osteolysis in a dose-dependent manner in vivo. (A) 3D & 2D rebuilt images, Scale bar, 5 mm (B) Quantitative analyses of BMD (mg/mm<sup>3</sup>). (C) Quantitative analyses of BV/TV (%). (D) Number of pores. (E) Area of porosity (%). (F) H&E staining images of liver and kidney collected from the control group, vehicle group and titanium particles + PCG group mice with different treated concentration of PCG (5 mg/kg, 10 mg/kg, 20 mg/kg, 30 mg/kg and 50 mg/kg), Scale bar, 50μm. All PCG treated groups were treated with 30 mg titanium particles. n=5. All data were expressed as the mean ± SD, \*\*p < 0.01, ns: no significance, compared with the vehicle group.

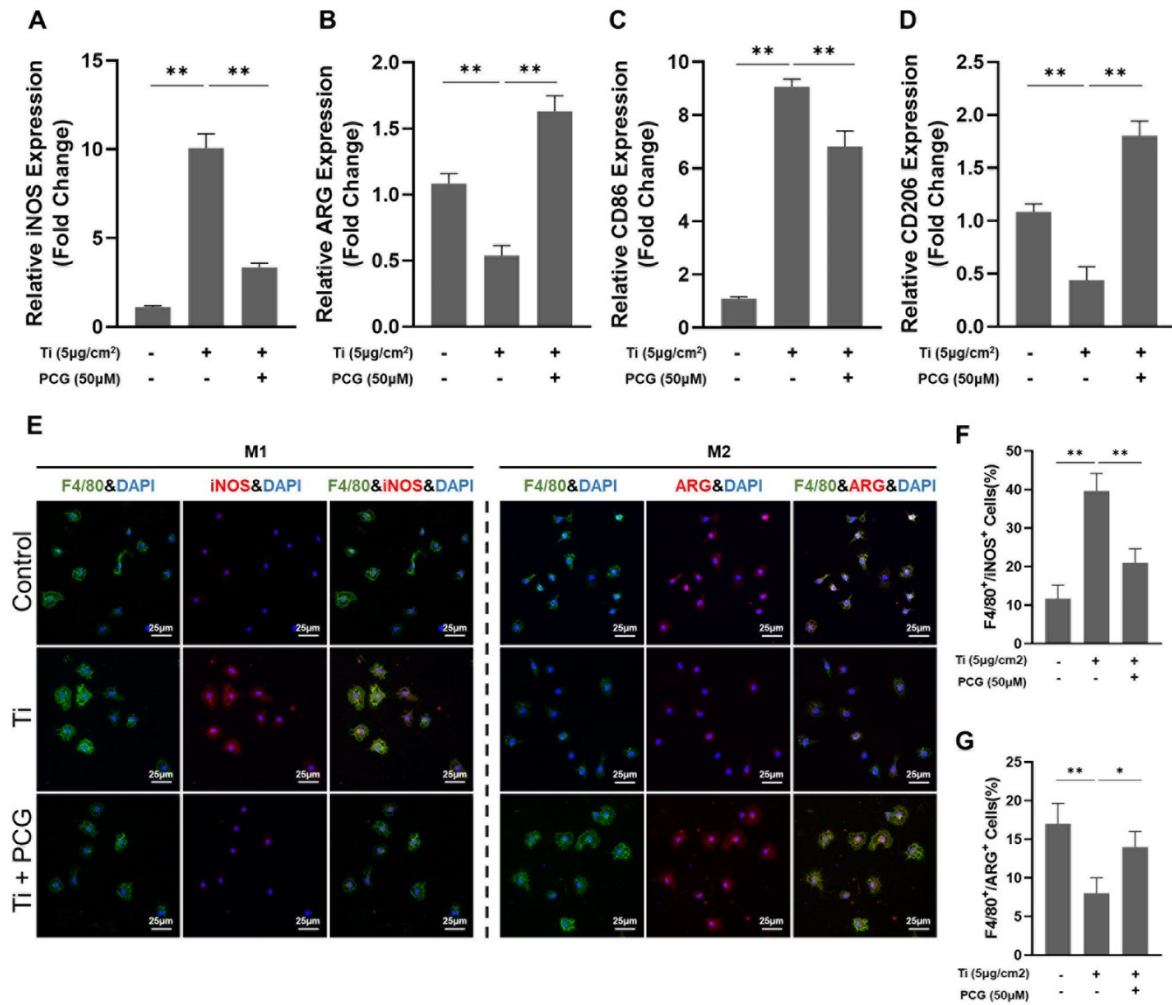

**Fig. S2.** PCG treatment reduced inflammatory reaction via reversing Ti particle induced M1 macrophage polarization in vitro. (A-D) The mRNA expression levels of M1 (iNOS, CD86) and M2 (ARG, CD206) macrophage phenotype.  $n=3$ . (E) Representative images of the Ti induced macrophages after coimmunostaining: red (M1 marker: iNOS and M2 marker: Arg-1), green (F4/80), and blue (nuclei). (F, G) Percentage of double-positive macrophages ( $n = 6$  per group). The concentration of titanium particles was  $5\mu\text{g}/\text{cm}^2$ . The concentration of PCG was  $50\mu\text{M}$ . Scale bar,  $25\mu\text{m}$ . All data were expressed as the mean  $\pm$  SD, \* $p < 0.05$ , \*\* $p < 0.01$ , compared with the Ti group.

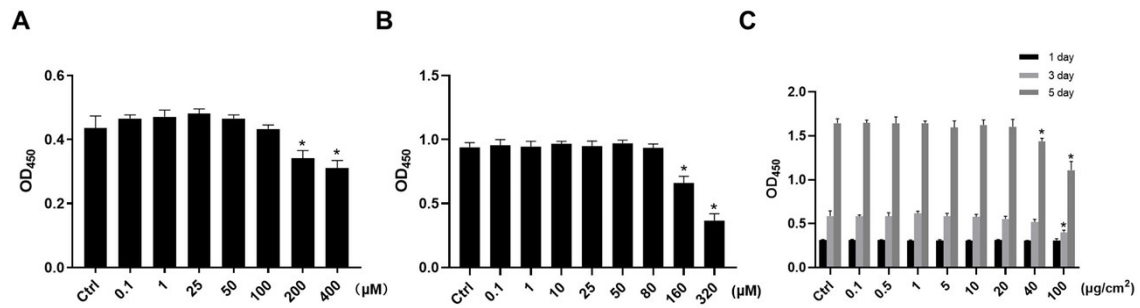

**Fig. S3.** Cell viability assay analysis. (A) Cell viability after 3 days of PCG stimulation in MC3T3-E1 cells. Cell viabilities were measured by CCK-8 assays. \* $p < 0.05$ , compared with control group. (B) Cell viability after 3 days of PCG stimulation in RAW264.7 cells. Cell viabilities were assessed by CCK-8 assays. \* $p < 0.05$ , compared with control group. (C) Cell viability after 1, 3, and 5 days of titanium particles stimulation. Cell viabilities were assessed by CCK-8 assays. \* $p < 0.05$ , compared with control group separately in 1, 3, and 5 day.  $n = 3$ . All data were expressed as the mean  $\pm$  SD.

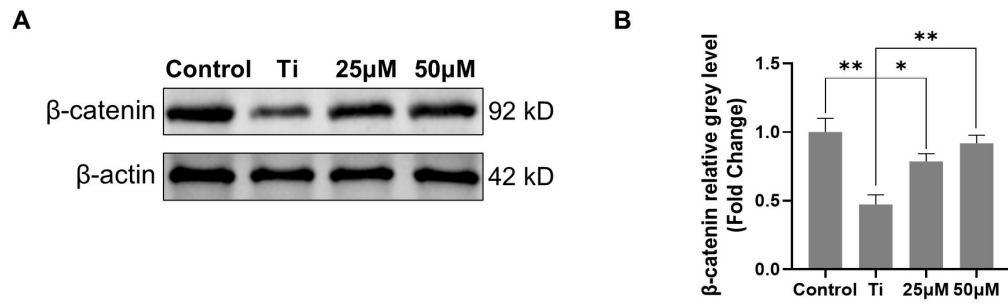

**Fig. S4.** PCG treatment rescued the Ti particle-induced inhibition of  $\beta$ -catenin in MC3T3-E1 cells. (A) Western blot analysis of expression levels of  $\beta$ -catenin. (B) The relative grey levels of  $\beta$ -catenin. The protein grayscale value was analyzed by ImageJ software. The concentration of titanium particles was  $5\mu\text{g}/\text{cm}^2$ . Both PCG-treated groups contained  $5\mu\text{g}/\text{cm}^2$  titanium particles.  $n=3$ . All data were expressed as the mean  $\pm$  SD, \* $p < 0.05$ , \*\* $p < 0.01$ , compared with the Ti group.

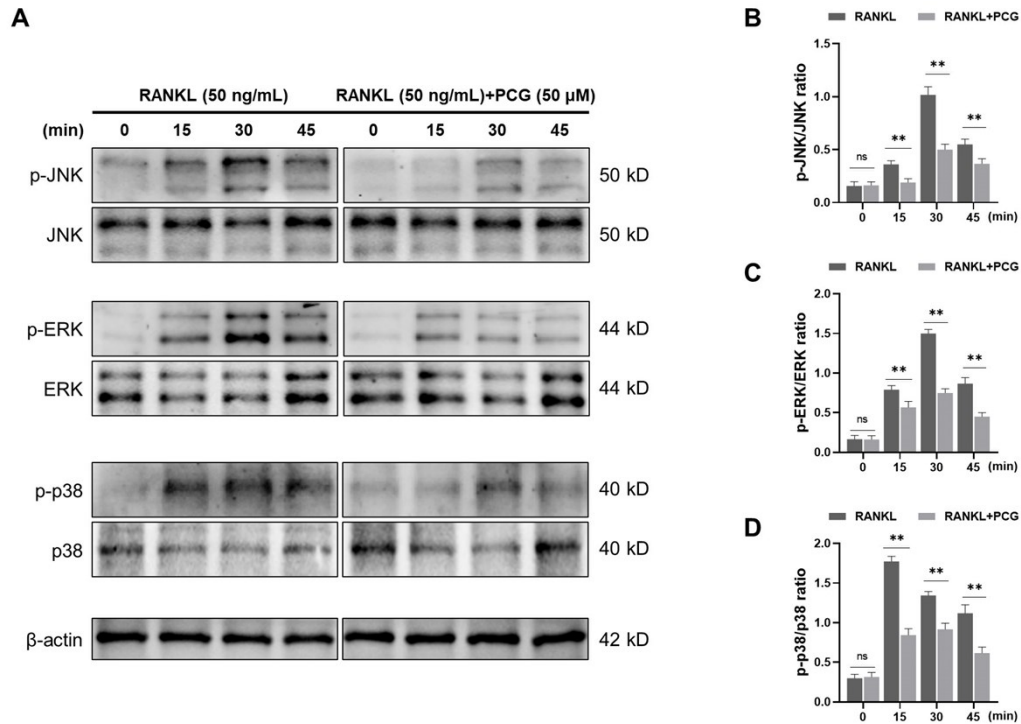

**Fig. S5.** PCG treatment inhibited osteoclastogenesis via MAPK signaling pathway. (A) Western blot analysis of expression levels of JNK, ERK, p38 and phosphorylation of JNK, ERK, p38. (B-D) The corresponding relative grey level ratio of p-JNK/ JNK, p-ERK/ ERK, p-p38/ p38. The protein grayscale value and ratio were analyzed by ImageJ software.  $n=3$ . All data were expressed as the mean $\pm$ SD, \*\* $p < 0.01$ , ns: no significance, compared with RANKL group in different time, separately.
